# Supplementary material for: A unique case of Bloom syndrome with a combination of genetic hits: A lesson from trio‑based exome sequencing: A case report
Source: Mol Med Rep. 2023 Apr 12;27(5):110. doi: 10.3892/mmr.2023.12997 (PMC10119849; doi:10.3892/mmr.2023.12997)
Supplement: Supporting Data [file Supplementary_Data2.xlsx]

## Sheet: Sheet 1_qPCR_primer
Table S1. Outputs of qPCR for the verification of 15q11.2 duplication in proband and her family. Sheet 1 summarizes the primers used for the verification of the 15q11.2 duplication (NIPA1, internal; FRMD5, external and ERH, endogenous control). Sheet 2 summarizes the results of qPCR with R‑values. The threshold of R‑values >1.3 was set for gains of DNA sequences. qPCR, quantitative PCR.
name	sequence 5'>3'	length (bp)	genomic position (GRCh38/hg38)
NIPA1_F	AAGGCGTCGCATGTGAAAA	128	chr15:22,813,629-22,813,756
NIPA1_R	CCAGACAGATGCCCAAATCC
FRMD5_F	ATCGCTGGGACTTGTTGCTA	119	chr15:44,194,285-44,194,403
FRMD5_R	GCCCAGTCCTCTGGGTTTTA
ERH_F	TGGGGAGGGGAAAACGTATG	113	chr14:69,398,149-69,398,261
ERH_R	GCTGCTGTAGCGAAGAGAGT

## Sheet: Sheet 2_BLM_qPCR 15q11.2 dup
family member	R-value 15q11.2 (NIPA1)	result
proband	1.53688	gain
mother	1.02811	normal
father	1.53688	gain
paternal uncle	1.04972	normal
paternal grandmother	1.13288	normal
paternal grandfather	1.6245	gain
