# Supplementary material for: A unique case of Bloom syndrome with a combination of genetic hits: A lesson from trio‑based exome sequencing: A case report
Source: Mol Med Rep. 2023 Apr 12;27(5):110. doi: 10.3892/mmr.2023.12997 (PMC10119849; doi:10.3892/mmr.2023.12997)
Supplement: Supporting Data [file Supplementary_Data3.xlsx]

## Sheet: QC_Bloom syndrome_case
Table S2. Values of technical parameters and QC metrics of ES. The QC metrics were calculated by the Picard tool (a part of the GATK algorithm) with three criteria: BED file (which is based on the Target and Capture design), mapping quality (0) and Phred base quality (5). QC, quality control; ES, exome sequencing; BED, browser extensible data.
Sample	TOTAL_READS	PF_UNIQUE_READS	PCT_SELECTED_BASES	PCT_OFF_BAIT	PCT_TARGET_BASES_1X	PCT_TARGET_BASES_10X	PCT_TARGET_BASES_20X	PCT_TARGET_BASES_30X	PCT_TARGET_BASES_100X	PCT_EXC_DUPE	MEAN_TARGET_COVERAGE	MEDIAN_TARGET_COVERAGE	MIN_TARGET_COVERAGE	MAX_TARGET_COVERAGE	AT_DROPOUT	GC_DROPOUT	HS_LIBRARY_SIZE	HS_PENALTY_30X	ZERO_CVG_TARGETS_PCT	FOLD_80_BASE_PENALTY
proband	102457230	86271711	0.835391	0.164609	0.996435	0.994973	0.994391	0.993619	0.607402	0.158411	113.381	108	0	3164	4.74756	0.293813	118397627	4.32186	0.003645	1.36603
mother	91522138	78276206	0.833003	0.166997	0.996207	0.994787	0.994139	0.993138	0.480041	0.145095	103.096	98	0	3100	4.81843	0.303327	116434072	4.35433	0.003729	1.37461
father	130987090	107631936	0.835773	0.164227	0.998578	0.997163	0.996696	0.996035	0.834282	0.178719	142.638	136	0	5278	4.48761	0.290747	132073853	4.28345	0.001248	1.37152
average	1.08322e+08	9.07266e+07	0.834722	0.165278	0.997073	0.995641	0.995075	0.994264	0.640575	0.160742	119.705	114	0	3847.33	4.68453	0.295962	1.22302e+08	4.31988	0.002874	1.37072
Table column legend is available on: https://broadinstitute.github.io/picard/picard-metric-definitions.html [accessed on 2023-01-07]
