# Supplementary material for: A unique case of Bloom syndrome with a combination of genetic hits: A lesson from trio‑based exome sequencing: A case report
Source: Mol Med Rep. 2023 Apr 12;27(5):110. doi: 10.3892/mmr.2023.12997 (PMC10119849; doi:10.3892/mmr.2023.12997)
Supplement: Supporting Data [file Supplementary_Data4.xlsx]

## Sheet: Sheet 1_in silico
Table S3: Outputs of in silico prediction tools, ACMG classification criteria and database records and literature data. Sheet 1 summarizes in silico prediction outputs for the BLM gene causative variants. Sheet 2 provides the annotation obtained by the Ensembl Variant Effect Predictor. ACMG, American College of Medical Genetics and Genomics.
The outputs of in silico prediction tools, ACMG classification criteria and database records and literature data
Sheet 1: The summary of in silico prediction outputs for the BLM gene causative variants
gene	genomic position (NC_000015.10)	transcript (NM_000057.4)	protein (NP_000048.1)	ACMG	VarSome	ClinVar	MutationTaster 2021	CADD Raw	CADD PHRED	NMDEsc Predictor	NMDetective (NMD-A;NMD-B)	gnomAD_AF	gnomAD_AFR_AF	gnomAD_AMR_AF	gnomAD_ASJ_AF	gnomAD_EAS_AF	gnomAD_FIN_AF	gnomAD_NFE_AF	gnomAD_OTH_AF	gnomAD_SAS_AF	MAX_AF	MAX_AF_POPS	dbSNP rsID	ClinVar mutation	HGMD mutation	MutationTaster 2021 (permalink)
BLM	g.90761015C>T	c.1642C>T	p.(Gln548Ter)	PVS1, PS3, PM2, PM3, PP4, PP5, BS6	P	P	D	5.713244	34	-	NMD (0.46; 0.41)	0.0001389	0	3.011e-05	0	0	0	0.0002869	0.0001695	0	0.0002869	gnomAD_NFE	rs200389141	132935	CM072892	https://www.genecascade.org/MT2021/MutationTaster102.cgi?new_base=T&transcript_stable_id_radio=ENST00000355112&sequence_type=CDS&gene=BLM&transcript_stable_id_text=ENST00000355112&position_be=1642
BLM	g.90766923_90766928delinsTAGATTC	c.2207_2212delinsTAGATTC	p.(Tyr736LeufsTer5)	PVS1, PS3, PM2, PM3, PP4, PP5	P	P	D	-	-	NMD	NMD (0.6; 0.65)	-	-	-	-	-	-	-	-	-	0.0003651	EA	rs113993962	20493	CX952002	https://www.genecascade.org/MT2021/MutationTaster102.cgi?transcript_stable_id_radio=ENST00000355112&bases_inserted=TAGATTC&sequence_type=CDS&gene=BLM&end_insdel=2213&start_insdel=2206&transcript_stable_id_text=ENST00000355112
The NMDetective resource predicts the efficacy of nonsense-mediated mRNA decay for a pre-mature stop codon at every protein-coding nucleotide in the human (or mouse) genome. NMD scores range from ~0 (no mRNA degradation by NMD), to >0.52, (strong mRNA degradation). NMDetectiveA is a comprehensive prediction of NMD efficacy, NMDetectiveB is a simplified and fully transparent decision tree model. A…
In silico tools, databases and related links:
VarSome (1)	https://varsome.com/
ClinVar (2)	https://www.ncbi.nlm.nih.gov/clinvar/
MutationTaster2021 (3)	https://www.genecascade.org/MutationTaster2021/
CADD (4)	https://cadd.gs.washington.edu/
NMDEsc Predictor (5)	https://nmdprediction.shinyapps.io/nmdescpredictor/
NMDetective (6)	https://figshare.com/articles/dataset/NMDetective/7803398
gnomAD (7)	https://gnomad.broadinstitute.org/
HGMD (8)	https://www.hgmd.cf.ac.uk/ac/index.php
The column legend (gnomAD) is available on:
https://www.ensembl.org/info/docs/tools/vep/vep_formats.html
[accessed on 2023-03-29]
References
1. Kopanos C, Tsiolkas V, Kouris A, Chapple CE, Albarca Aguilera M, Meyer R and Massouras A: VarSome: the human genomic variant search engine. Bioinformatics 35: 1978-1980, 2019
2. Landrum MJ, Lee JM, Benson B, Brown GR, Chao C, Chitipiralla S, Gu B, Hart J, Hoffman D, Jang W, et al: ClinVar: Improving access to variant interpretations and supporting evidence. Nucleic Acids Res 46: D1062-D1067, 2018.
3. Steinhaus R, Proft S, Schuelke M, Cooper DN, Schwarz JM, Seelow D: MutationTaster2021. Nucleic Acids Res 49: W446-W451, 2021.
4. Rentzsch P, Witten D, Cooper GM, Shendure J, Kircher M: CADD: prediction the deleteriousness of variants throughout the human genome. Nucleic Acids Res 47: D886-D894, 2019.
5. Coban-Akdemir Z, White JJ, Song X, Jhangiani SN, Faith JM, Gambin T, Bayram Y, Chinn IK, Karaca E, Punetha J, et al: Identifying Genes Whose Mutant Transcripts Cause Dominant Disease Traits by Potential Gain-of-Function Alleles. Am J Hum Genet 103: 171-187, 2018.
6. Lindeboom RGH, Vermeulen M, Lehner B, Supek F: The impact of nonsense-mediated mRNA decay on genetic disease, gene editing and cancer immunotherapy. Nat Genet 51: 1645-1651, 2019.
7. Karczewski KJ, Francioli LC, Tiao G, Cummings BB, Alföldi J, Wang Q, Collins RL, Laricchia KM, Ganna A, Birnbaum DP, et al: The mutational constraint spectrum quantified from variation in 141,456 humans. Nature 581: 434-443, 2020.
8. Stenson PD, Ball EV, Mort M, Phillips MD, Shiel JA, Thomas NST, Abeysinghe S, Krawczak M, Cooper DN: Human Gene Mutation Database (HGMD): 2003 update. Hum Mutat 21: 577-581, 2003.

## Sheet: Sheet 2_VEP
The outputs of in silico prediction tools, ACMG classification criteria and database records and literature data
Sheet 2: The annotation obtained by Ensembl Variant Effect Predictor
#Uploaded_variation	Location	Allele	Consequence	IMPACT	SYMBOL	Gene	Feature_type	Feature	BIOTYPE	EXON	INTRON	HGVSc	HGVSp	cDNA_position	CDS_position	Protein_position	Amino_acids	Codons	Existing_variation	DISTANCE	STRAND	FLAGS	SYMBOL_SOURCE	HGNC_ID	MANE_SELECT	MANE_PLUS_CLINICAL	TSL	APPRIS	ENSP	REFSEQ_MATCH	REFSEQ_OFFSET	GIVEN_REF	USED_REF	BAM_EDIT	SIFT	AF	AFR_AF	AMR_AF	EAS_AF	EUR_AF	SAS_AF	gnomAD_AF	gnomAD_AFR_AF	gnomAD_AMR_AF	gnomAD_ASJ_AF	gnomAD_EAS_AF	gnomAD_FIN_AF	gnomAD_NFE_AF	gnomAD_OTH_AF
NM_000057.4:c.1642C>T	15:90761015-90761015	T	stop_gained	HIGH	BLM	641	Transcript	NM_000057.4	protein_coding	7/22	-	-	-	1741	1642	548	Q/*	Caa/Taa	rs200389141,CM072892,COSV61924304,COSV61927526	-	1	-	EntrezGene	-	ENST00000355112.8	-	-	-	NP_000048.1	-	-	C	C	-	-	-	-	-	-	-	-	0.0001389	0	3.011e-05	0	0	0	0.0002869	0.0001695
NM_000057.4:c.1642C>T	15:90761015-90761015	T	stop_gained	HIGH	BLM	641	Transcript	NM_001287246.2	protein_coding	8/23	-	-	-	1851	1642	548	Q/*	Caa/Taa	rs200389141,CM072892,COSV61924304,COSV61927526	-	1	-	EntrezGene	-	-	-	-	-	NP_001274175.1	-	-	C	C	-	-	-	-	-	-	-	-	0.0001389	0	3.011e-05	0	0	0	0.0002869	0.0001695
NM_000057.4:c.1642C>T	15:90761015-90761015	T	stop_gained	HIGH	BLM	641	Transcript	NM_001287247.2	protein_coding	7/20	-	-	-	1741	1642	548	Q/*	Caa/Taa	rs200389141,CM072892,COSV61924304,COSV61927526	-	1	-	EntrezGene	-	-	-	-	-	NP_001274176.1	-	-	C	C	-	-	-	-	-	-	-	-	0.0001389	0	3.011e-05	0	0	0	0.0002869	0.0001695
NM_000057.4:c.1642C>T	15:90761015-90761015	T	stop_gained	HIGH	BLM	641	Transcript	NM_001287248.2	protein_coding	7/22	-	-	-	1907	517	173	Q/*	Caa/Taa	rs200389141,CM072892,COSV61924304,COSV61927526	-	1	-	EntrezGene	-	-	-	-	-	NP_001274177.1	-	-	C	C	-	-	-	-	-	-	-	-	0.0001389	0	3.011e-05	0	0	0	0.0002869	0.0001695
NM_000057.4:c.1642C>T	15:90761015-90761015	T	upstream_gene_variant	MODIFIER	BLM	641	Transcript	XM_006720632.2	protein_coding	-	-	-	-	-	-	-	-	-	rs200389141,CM072892,COSV61924304,COSV61927526	1349	1	-	EntrezGene	-	-	-	-	-	XP_006720695.1	-	-	C	C	-	-	-	-	-	-	-	-	0.0001389	0	3.011e-05	0	0	0	0.0002869	0.0001695
NM_000057.4:c.1642C>T	15:90761015-90761015	T	stop_gained	HIGH	BLM	641	Transcript	XM_011521881.2	protein_coding	4/19	-	-	-	795	328	110	Q/*	Caa/Taa	rs200389141,CM072892,COSV61924304,COSV61927526	-	1	-	EntrezGene	-	-	-	-	-	XP_011520183.1	-	-	C	C	-	-	-	-	-	-	-	-	0.0001389	0	3.011e-05	0	0	0	0.0002869	0.0001695
NM_000057.4:c.1642C>T	15:90761015-90761015	T	stop_gained	HIGH	BLM	641	Transcript	XM_011521882.3	protein_coding	7/13	-	-	-	1689	1642	548	Q/*	Caa/Taa	rs200389141,CM072892,COSV61924304,COSV61927526	-	1	-	EntrezGene	-	-	-	-	-	XP_011520184.1	-	-	C	C	-	-	-	-	-	-	-	-	0.0001389	0	3.011e-05	0	0	0	0.0002869	0.0001695
NM_000057.4:c.2207_2212delinsTAGATTC	15:90766922-90766928	TAGATTC	frameshift_variant	HIGH	BLM	641	Transcript	NM_000057.4	protein_coding	10/22	-	-	-	2306-2311	2207-2212	736-738	YLT/LDSX	tATCTGAca/tTAGATTCca	rs113993962	-	1	-	EntrezGene	-	ENST00000355112.8	-	-	-	NP_000048.1	-	-	ATCTGA	ATCTGA	-	-	-	-	-	-	-	-	-	-	-	-	-	-	-	-
NM_000057.4:c.2207_2212delinsTAGATTC	15:90766922-90766928	TAGATTC	frameshift_variant	HIGH	BLM	641	Transcript	NM_001287246.2	protein_coding	11/23	-	-	-	2416-2421	2207-2212	736-738	YLT/LDSX	tATCTGAca/tTAGATTCca	rs113993962	-	1	-	EntrezGene	-	-	-	-	-	NP_001274175.1	-	-	ATCTGA	ATCTGA	-	-	-	-	-	-	-	-	-	-	-	-	-	-	-	-
NM_000057.4:c.2207_2212delinsTAGATTC	15:90766922-90766928	TAGATTC	frameshift_variant	HIGH	BLM	641	Transcript	NM_001287247.2	protein_coding	10/20	-	-	-	2306-2311	2207-2212	736-738	YLT/LDSX	tATCTGAca/tTAGATTCca	rs113993962	-	1	-	EntrezGene	-	-	-	-	-	NP_001274176.1	-	-	ATCTGA	ATCTGA	-	-	-	-	-	-	-	-	-	-	-	-	-	-	-	-
NM_000057.4:c.2207_2212delinsTAGATTC	15:90766922-90766928	TAGATTC	frameshift_variant	HIGH	BLM	641	Transcript	NM_001287248.2	protein_coding	10/22	-	-	-	2472-2477	1082-1087	361-363	YLT/LDSX	tATCTGAca/tTAGATTCca	rs113993962	-	1	-	EntrezGene	-	-	-	-	-	NP_001274177.1	-	-	ATCTGA	ATCTGA	-	-	-	-	-	-	-	-	-	-	-	-	-	-	-	-
NM_000057.4:c.2207_2212delinsTAGATTC	15:90766922-90766928	TAGATTC	frameshift_variant	HIGH	BLM	641	Transcript	XM_006720632.2	protein_coding	4/16	-	-	-	384-389	245-250	82-84	YLT/LDSX	tATCTGAca/tTAGATTCca	rs113993962	-	1	-	EntrezGene	-	-	-	-	-	XP_006720695.1	-	-	ATCTGA	ATCTGA	-	-	-	-	-	-	-	-	-	-	-	-	-	-	-	-
NM_000057.4:c.2207_2212delinsTAGATTC	15:90766922-90766928	TAGATTC	frameshift_variant	HIGH	BLM	641	Transcript	XM_011521881.2	protein_coding	7/19	-	-	-	1360-1365	893-898	298-300	YLT/LDSX	tATCTGAca/tTAGATTCca	rs113993962	-	1	-	EntrezGene	-	-	-	-	-	XP_011520183.1	-	-	ATCTGA	ATCTGA	-	-	-	-	-	-	-	-	-	-	-	-	-	-	-	-
NM_000057.4:c.2207_2212delinsTAGATTC	15:90766922-90766928	TAGATTC	frameshift_variant	HIGH	BLM	641	Transcript	XM_011521882.3	protein_coding	10/13	-	-	-	2254-2259	2207-2212	736-738	YLT/LDSX	tATCTGAca/tTAGATTCca	rs113993962	-	1	-	EntrezGene	-	-	-	-	-	XP_011520184.1	-	-	ATCTGA	ATCTGA	-	-	-	-	-	-	-	-	-	-	-	-	-	-	-	-
The column legend is available on:
https://www.ensembl.org/info/docs/tools/vep/vep_formats.html
[accessed on 2023-03-29]
[truncated: 30 more columns]
